# Supplementary material
Source: publisher figshare collection journal article supplement (https://karger.figshare.com/articles/dataset/_/5123815)
Supplement: Supplementary file 1 [file 1]

**Supplementary Table 1:** Two-locus model used in simulations.

| Scénario    | $G_2$ | Penetrance function for<br>the specific phenotype<br>$f_S(G_1, G_2)$ |      |      | Penetrance function for other<br>phenotypes within broad<br>$(f_B - f_S)(G_1, G_2)$ |      |      | Complement of the penetrance<br>function for the unaffected subjects<br>$1 - f_B(G_1, G_2)$ |      |      |
|-------------|-------|----------------------------------------------------------------------|------|------|-------------------------------------------------------------------------------------|------|------|---------------------------------------------------------------------------------------------|------|------|
|             |       | $G_1$                                                                |      |      | $G_1$                                                                               |      |      | $G_1$                                                                                       |      |      |
|             |       | a/a                                                                  | A/a  | A/A  | a/a                                                                                 | A/a  | A/A  | a/a                                                                                         | A/a  | A/A  |
| 1           | a/a   | 0                                                                    | 0    | 0    | 0.02                                                                                | 0.52 | 0.52 | 0.98                                                                                        | 0.48 | 0.48 |
| $p_1=0.03$  | A/a   | 0                                                                    | 0.89 | 0.89 | 0.02                                                                                | 0.02 | 0.02 | 0.98                                                                                        | 0.09 | 0.09 |
| $p_2=0.1$   | A/A   | 0                                                                    | 0.89 | 0.89 | 0.02                                                                                | 0.02 | 0.02 | 0.98                                                                                        | 0.09 | 0.09 |
| 2           | a/a   | 0                                                                    | 0    | 0    | 0                                                                                   | 0.89 | 0.89 | 1                                                                                           | 0.11 | 0.11 |
| $p_1=0.03$  | A/a   | 0                                                                    | 0.89 | 0.89 | 0                                                                                   | 0    | 0    | 1                                                                                           | 0.11 | 0.11 |
| $p_2=0.1$   | A/A   | 0                                                                    | 0.89 | 0.89 | 0                                                                                   | 0    | 0    | 1                                                                                           | 0.11 | 0.11 |
| 3           | a/a   | 1.0e-4                                                               | 0.05 | 0.05 | 9e-4                                                                                | 0.45 | 0.45 | 0.999                                                                                       | 0.5  | 0.5  |
| $p_1=0.027$ | A/a   | 0.5                                                                  | 0.5  | 0.5  | 0                                                                                   | 0    | 0    | 0.5                                                                                         | 0.5  | 0.5  |
| $p_2=0.027$ | A/A   | 0.5                                                                  | 0.5  | 0.5  | 0                                                                                   | 0    | 0    | 0.5                                                                                         | 0.5  | 0.5  |

$G_1$  : Genotype at locus 1,  $G_2$  : Genotype at locus 2,  $p_1$ : A allele frequency in locus 1,  $p_2$ : A allele frequency in locus 2

**Supplementary Table 2:** Descriptive statistics of the simulated families.

| Scenario | Specific phenotype |        | Other phenotype |        | Total broad phenotype |        |
|----------|--------------------|--------|-----------------|--------|-----------------------|--------|
|          | Mean               | Range  | Mean            | Range  | Mean                  | Range  |
| 1        | 5                  | 2 – 13 | 2               | 0 – 7  | 7                     | 3 – 13 |
| 2        | 5                  | 2 – 13 | 3               | 0 – 9  | 8                     | 3 – 15 |
| 3        | 3                  | 1 – 10 | 3               | 1 – 11 | 6                     | 3 – 13 |

**Supplementary Table 3:** Signal at modifier locus (locus 2) using joint modeling of a specific and a broad phenotype under simulation scenario 2.

| Statistic <sup>a</sup> |                    |                                               | Two epistatic genes only<br>(100 replicate samples of 10 families) |                       |                    |                                    | Two epistatic genes plus heterogeneity<br>(100 replicate samples of 40 families) |                       |                    |                                    |
|------------------------|--------------------|-----------------------------------------------|--------------------------------------------------------------------|-----------------------|--------------------|------------------------------------|----------------------------------------------------------------------------------|-----------------------|--------------------|------------------------------------|
|                        |                    |                                               | Mean (SD)                                                          | Mean $\theta$<br>(SD) | Power <sup>b</sup> | Power <sup>b</sup><br>(pre-select) | Mean (SD)                                                                        | Mean $\theta$<br>(SD) | Power <sup>b</sup> | Power <sup>b</sup><br>(pre-select) |
| All families           | One-locus analyses | LOD within broad ( $Z_w^{1L}$ )               | 4.74 (1.96)                                                        | 0.05 (0.04)           | 0.84               | NA                                 | 3.40 (2.10)                                                                      | 0.22 (0.06)           | 0.60               | NA                                 |
|                        |                    | HLOD within broad ( $Z_w^{H-1L}$ )            | 4.92 (1.85)                                                        | 0.03 (0.04)           | 0.88               | NA                                 | 5.16 (2.08)                                                                      | 0.05 (0.05)           | 0.91               | NA                                 |
|                        | Two-locus analyses | Conditional LOD ( $Z^{COND}$ )                | 6.28 (1.76)                                                        | 0.00 (0.02)           | 0.97               | 0.97                               | 5.44 (2.07)                                                                      | 0.08 (0.08)           | 0.95               | 0.96                               |
|                        |                    | Sliced LOD ( $Z^{SLICED}$ )                   | 6.29 (1.76)                                                        | 0.00 (0.02)           | 0.97               | 0.97                               | 5.46 (2.08)                                                                      | 0.08 (0.08)           | 0.95               | 0.96                               |
|                        |                    | Conditional HLOD ( $Z^{H-COND}$ )             | 6.29 (1.76)                                                        | 0.00 (0.01)           | 0.97               | 0.97                               | 6.77 (2.17)                                                                      | 0.02 (0.04)           | 0.99               | 0.99                               |
|                        |                    | Sliced HLOD ( $Z^{H-SLICED}$ )                | 6.29 (1.76)                                                        | 0.00 (0.01)           | 0.97               | 0.97                               | 6.44 (2.09)                                                                      | 0.02 (0.05)           | 0.99               | 0.99                               |
| Selected families      | One-locus analyses | LOD within broad ( $Z_w^{1L+}$ ) <sup>c</sup> | 4.63 (1.94)                                                        | 0.05 (0.04)           | 0.85               | NA                                 | 6.17 (2.40)                                                                      | 0.11 (0.05)           | 0.97               | NA                                 |
|                        | Two-locus analyses | Conditional LOD ( $Z^{COND+}$ )               | 6.03 (1.79)                                                        | 0.00 (0.02)           | 0.95               | 0.97                               | 9.10 (2.52)                                                                      | 0.05 (0.05)           | 1.00               | 1.00                               |
|                        |                    | Sliced LOD ( $Z^{SLICED+}$ )                  | 6.01 (1.79)                                                        | 0.00 (0.02)           | 0.97               | 0.97                               | 8.52 (2.47)                                                                      | 0.04 (0.05)           | 1.00               | 1.00                               |

<sup>a</sup> All statistics are maximized over the corresponding model family (one-locus or two-locus model family) with the specific phenotype prevalence set to  $\pi_S = 0.01$  and the broad phenotype prevalence set to  $\pi_B = 0.053$

<sup>b</sup> Power for significance level  $\alpha = 0.0017$

<sup>c</sup> Families with  $Z_i^{2L}(\tilde{\theta}_1(k), \frac{1}{2}, k) > 0$  (as in  $Z^{COND+}$ )

**Supplementary Table 4:** Signal at modifier locus (locus 2) using joint modeling of a specific and a broad phenotype under simulation scenario 1, without requiring an unaffected pivot.

| Statistic <sup>a</sup> |                    |                                               | Two epistatic genes only<br>(100 replicate samples of 10 families) |                       |                    |                                    | Two epistatic genes plus heterogeneity<br>(100 replicate samples of 40 families) |                       |                    |                                    |
|------------------------|--------------------|-----------------------------------------------|--------------------------------------------------------------------|-----------------------|--------------------|------------------------------------|----------------------------------------------------------------------------------|-----------------------|--------------------|------------------------------------|
|                        |                    |                                               | Mean (SD)                                                          | Mean $\theta$<br>(SD) | Power <sup>b</sup> | Power <sup>b</sup><br>(pre-select) | Mean (SD)                                                                        | Mean $\theta$<br>(SD) | Power <sup>b</sup> | Power <sup>b</sup><br>(pre-select) |
| All families           | One-locus analyses | LOD within broad ( $Z_w^{1L}$ )               | 3.94 (2.20)                                                        | 0.08 (0.06)           | 0.73               | NA                                 | 2.86 (1.92)                                                                      | 0.22 (0.08)           | 0.52               | NA                                 |
|                        |                    | HLOD within broad ( $Z_w^{H-1L}$ )            | 4.21 (2.18)                                                        | 0.01 (0.03)           | 0.94               | NA                                 | 4.58 (2.28)                                                                      | 0.05 (0.06)           | 0.87               | NA                                 |
|                        | Two-locus analyses | Conditional LOD ( $Z^{COND}$ )                | 5.79 (2.18)                                                        | 0.01 (0.03)           | 0.94               | 0.94                               | 5.30 (2.47)                                                                      | 0.09 (0.08)           | 0.89               | 0.89                               |
|                        |                    | Sliced LOD ( $Z^{SLICED}$ )                   | 5.81 (2.18)                                                        | 0.01 (0.03)           | 0.94               | 0.94                               | 5.31 (2.48)                                                                      | 0.09 (0.08)           | 0.89               | 0.89                               |
|                        |                    | Conditional HLOD ( $Z^{H-COND}$ )             | 5.84 (2.17)                                                        | 0.01 (0.03)           | 0.94               | 0.94                               | 6.53 (2.62)                                                                      | 0.02 (0.04)           | 0.95               | 0.95                               |
|                        |                    | Sliced HLOD ( $Z^{H-SLICED}$ )                | 5.85 (2.17)                                                        | 0.01 (0.03)           | 0.94               | 0.94                               | 6.37 (2.63)                                                                      | 0.02 (0.04)           | 0.94               | 0.94                               |
| Selected families      | One-locus analyses | LOD within broad ( $Z_w^{1L+}$ ) <sup>c</sup> | 3.87 (2.25)                                                        | 0.07 (0.07)           | 0.67               | NA                                 | 4.91 (2.52)                                                                      | 0.13 (0.07)           | 0.85               | NA                                 |
|                        | Two-locus analyses | Conditional LOD ( $Z^{COND+}$ )               | 5.48 (2.16)                                                        | 0.01 (0.03)           | 0.89               | 0.92                               | 8.23 (2.52)                                                                      | 0.06 (0.06)           | 0.99               | 0.99                               |
|                        |                    | Sliced LOD ( $Z^{SLICED+}$ )                  | 5.45 (2.20)                                                        | 0.01 (0.03)           | 0.90               | 0.93                               | 7.72 (2.57)                                                                      | 0.05 (0.05)           | 0.97               | 0.97                               |

<sup>a</sup> All statistics are maximized over the corresponding model family (one-locus or two-locus model family) with the specific phenotype prevalence set to  $\pi_S = 0.01$  and the broad phenotype prevalence set to  $\pi_B = 0.053$

<sup>b</sup> Power for significance level  $\alpha = 0.0017$

<sup>c</sup> Families with  $Z_i^{2L}(\tilde{\theta}_1(k), \frac{1}{2}, k) > 0$  (as in  $Z^{COND+}$ )

**Supplementary Table 5:** Signal at locus 2 using joint modeling of a specific and a broad phenotype under simulation scenario 3.

|                   |                    | Statistic <sup>a</sup>                        | Mean (SD)   | Mean $\theta$ (SD) | Power <sup>b</sup> | Power <sup>b</sup><br>(pre-select) |
|-------------------|--------------------|-----------------------------------------------|-------------|--------------------|--------------------|------------------------------------|
| All families      | One-locus analyses | LOD ( $Z^{1L}$ )                              | 4.30 (2.02) | 0.04 (0.06)        | 0.80               | NA                                 |
|                   |                    | HLOD ( $Z^{H-1L}$ )                           | 4.39 (1.99) | 0.03 (0.05)        | 0.79               | NA                                 |
|                   |                    | LOD within broad ( $Z_w^{1L}$ )               | 4.43 (2.16) | 0.05 (0.05)        | 0.77               | NA                                 |
|                   |                    | HLOD within broad ( $Z_w^{H-1L}$ )            | 4.58 (2.16) | 0.03 (0.05)        | 0.75               | NA                                 |
|                   | Two-locus analyses | Conditional LOD ( $Z^{COND}$ )                | 4.91 (2.20) | 0.02 (0.04)        | 0.84               | 0.82                               |
|                   |                    | Sliced LOD ( $Z^{SLICED}$ )                   | 4.92 (2.20) | 0.02 (0.04)        | 0.84               | 0.82                               |
|                   |                    | Conditional HLOD ( $Z^{H-COND}$ )             | 4.98 (2.18) | 0.01 (0.03)        | 0.82               | 0.81                               |
|                   |                    | Sliced HLOD ( $Z^{H-SLICED}$ )                | 4.99 (2.19) | 0.02 (0.04)        | 0.82               | 0.81                               |
| Selected families | One-locus analyses | LOD within broad ( $Z_w^{1L+}$ ) <sup>c</sup> | 2.89 (1.66) | 0.05 (0.06)        | 0.55               | NA                                 |
|                   | Two-locus analyses | Conditional LOD ( $Z^{COND+}$ )               | 3.10 (1.50) | 0.04 (0.08)        | 0.51               | 0.51                               |
|                   |                    | Sliced LOD ( $Z^{SLICED+}$ )                  | 3.08 (1.57) | 0.03 (0.06)        | 0.53               | 0.55                               |

<sup>a</sup> All statistics are maximized over the corresponding model family (one-locus or two-locus model family) with the specific phenotype prevalence set to  $\pi_S = 0.01$  and the broad phenotype prevalence set to  $\pi_B = 0.053$

<sup>b</sup> Power for significance level  $\alpha = 0.0017$

<sup>c</sup> Families with  $Z_i^{2L}(\tilde{\theta}_1(k), \frac{1}{2}, k) > 0$  (as in  $Z^{COND+}$ )

**Supplementary Table 6:** prevalence of the different phenotypes

| phenotype                | prevalence (%) | definition and justification                                                                     |
|--------------------------|----------------|--------------------------------------------------------------------------------------------------|
| SZ narrow                | 1.0            | Schizophrenia [1,2]                                                                              |
| SZ extended              | 1.2            | SZ narrow + small increment to account for schizophreniform disorder and schizotypal personality |
| BP narrow                | 1.0            | Type I bipolar disorder [3]                                                                      |
| BP extended              | 7.0            | BP narrow subjects + subjects with recurrent MDD [4-6]                                           |
| Major psychosis narrow   | 2.3            | SZ narrow subjects + BP narrow subjects + schizo-affective disorder                              |
| Major psychosis extended | 8.5            | SZ extended subjects + BP extended subjects + schizo-affective disorder                          |

1. Hafner H, an der Heiden W: Epidemiology of schizophrenia. Can J Psychiatry 1997;42:139-151.
2. Torrey EF: Prevalence studies in schizophrenia. Br J Psychiatry 1987;150:598-608.
3. Angst J: The emerging epidemiology of hypomania and bipolar II disorder. J Affect Disord 1998;50:143-151.
4. Grolleau A, Cougnard A, Begaud B, Verdoux H: Congruence between diagnosis of recurrent major depressive disorder and psychotropic treatment in the general population. Acta Psychiatr Scand 2008;117:20-27.
5. Hardeveld F, Spijker J, De Graaf R, Nolen WA, Beekman AT: Prevalence and predictors of recurrence of major depressive disorder in the adult population. Acta Psychiatr Scand;122:184-191.
6. Janzing JG, de Graaf R, ten Have M, Vollebergh WA, Verhagen M, Buitelaar JK: Familiality of depression in the community; associations with gender and phenotype of major depressive disorder. Soc Psychiatry Psychiatr Epidemiol 2009;44:1067-1074.

**Supplementary Table 7:** list of marker pairs tested in the analysis of the Eastern Quebec mixed SZ and BP kindreds

| <b>locus 1</b> | <b>locus 2</b> | <b>pheno 1</b> | <b>pheno 2</b> |
|----------------|----------------|----------------|----------------|
| D2S298         | D3S1579        | MP-extended    | SZ-narrow      |
|                | D3S3023        | MP-extended    | SZ-narrow      |
|                | D3S3023        | MP-extended    | SZ-extended    |
|                | 478B14-848     | MP-extended    | SZ-narrow      |
|                | D8S1110        | MP-extended    | BP-narrow      |
|                | D8S1110        | MP-extended    | SZ-extended    |
|                | D8S1110        | MP-extended    | SZ-narrow      |
|                | D13S1233       | MP-extended    | BP-extended    |
|                | D13S1312       | MP-extended    | SZ-narrow      |
|                | D13S287        | MP-extended    | SZ-extended    |
|                | D13S287        | MP-extended    | SZ-narrow      |
|                | D13S326        | MP-extended    | BP-extended    |
|                | D13S788        | MP-extended    | SZ-extended    |
|                | D13S788        | MP-extended    | SZ-narrow      |
|                | D15S540        | MP-extended    | SZ-extended    |
| D3S1558        | 478B14-848     | MP-extended    | SZ-narrow      |
|                | D8S1110        | MP-extended    | SZ-extended    |
|                | D8S1110        | MP-extended    | SZ-narrow      |
|                | D8S1110        | MP-extended    | BP-narrow      |
|                | D13S1233       | MP-extended    | BP-extended    |
|                | D13S1312       | MP-extended    | SZ-narrow      |
|                | D13S287        | MP-extended    | SZ-extended    |
|                | D13S287        | MP-extended    | SZ-narrow      |
|                | D13S326        | MP-extended    | BP-extended    |
|                | D13S788        | MP-extended    | SZ-extended    |
|                | D13S788        | MP-extended    | SZ-narrow      |
|                | D15S540        | MP-extended    | SZ-extended    |
| D3S2418        | 478B14-848     | MP-extended    | SZ-narrow      |
|                | D8S1110        | MP-extended    | SZ-extended    |
|                | D8S1110        | MP-extended    | SZ-narrow      |
|                | D8S1110        | MP-extended    | BP-narrow      |
|                | D13S1233       | MP-extended    | BP-extended    |
|                | D13S1312       | MP-extended    | SZ-narrow      |
|                | D13S287        | MP-extended    | SZ-extended    |
|                | D13S287        | MP-extended    | SZ-narrow      |
|                | D13S326        | MP-extended    | BP-extended    |
|                | D13S788        | MP-extended    | SZ-narrow      |
|                | D13S788        | MP-extended    | SZ-extended    |
|                | D15S540        | MP-extended    | SZ-extended    |
| D6S334         | D3S1579        | MP-extended    | SZ-narrow      |
|                | D3S3023        | MP-extended    | SZ-narrow      |
|                | D3S3023        | MP-narrow      | SZ-narrow      |
|                | D3S3023        | MP-extended    | SZ-extended    |
|                | 478B14-848     | MP-extended    | SZ-narrow      |
|                | D8S1110        | MP-extended    | SZ-narrow      |
|                | D8S1110        | MP-extended    | SZ-extended    |
|                | D8S1110        | MP-narrow      | SZ-narrow      |

|         |            |             |             |
|---------|------------|-------------|-------------|
|         | D8S1110    | MP-extended | BP-narrow   |
|         | D8S1110    | MP-narrow   | BP-narrow   |
|         | D13S1233   | MP-extended | BP-extended |
|         | D13S1312   | MP-extended | SZ-narrow   |
|         | D13S287    | MP-extended | SZ-narrow   |
|         | D13S287    | MP-extended | SZ-extended |
|         | D13S326    | MP-extended | BP-extended |
|         | D13S788    | MP-extended | SZ-narrow   |
|         | D13S788    | MP-extended | SZ-extended |
|         | D15S540    | MP-extended | SZ-extended |
|         | D18S1145   | MP-narrow   | SZ-narrow   |
|         | D18S472    | MP-narrow   | SZ-narrow   |
|         | D18S72     | MP-narrow   | SZ-narrow   |
|         | D18S851    | MP-narrow   | BP-narrow   |
|         | D18S851    | MP-narrow   | SZ-narrow   |
| D10S245 | D3S1579    | MP-extended | SZ-narrow   |
|         | D3S3023    | MP-extended | SZ-narrow   |
|         | D3S3023    | MP-extended | SZ-extended |
|         | 478B14-848 | MP-extended | SZ-narrow   |
|         | D8S1110    | MP-extended | BP-narrow   |
|         | D8S1110    | MP-extended | SZ-extended |
|         | D8S1110    | MP-extended | SZ-narrow   |
|         | D13S1233   | MP-extended | BP-extended |
|         | D13S1312   | MP-extended | SZ-narrow   |
|         | D13S287    | MP-extended | SZ-narrow   |
|         | D13S287    | MP-extended | SZ-extended |
|         | D13S326    | MP-extended | BP-extended |
|         | D13S788    | MP-extended | SZ-extended |
|         | D13S788    | MP-extended | SZ-narrow   |
|         | D15S540    | MP-extended | SZ-extended |
| D15S540 | D3S1579    | MP-extended | SZ-narrow   |
|         | D3S3023    | MP-extended | SZ-narrow   |
|         | D3S3023    | MP-extended | SZ-extended |
|         | 478B14-848 | MP-extended | SZ-narrow   |
|         | D8S1110    | MP-extended | SZ-extended |
|         | D8S1110    | MP-extended | SZ-narrow   |
|         | D8S1110    | MP-extended | BP-narrow   |
|         | D13S1233   | MP-extended | BP-extended |
|         | D13S1312   | MP-extended | SZ-narrow   |
|         | D13S287    | MP-extended | SZ-extended |
|         | D13S287    | MP-extended | SZ-narrow   |
|         | D13S326    | MP-extended | BP-extended |
|         | D13S788    | MP-extended | SZ-extended |
|         | D13S788    | MP-extended | SZ-narrow   |
| GABRA5  | D3S1579    | MP-extended | SZ-narrow   |
|         | D3S3023    | MP-extended | SZ-narrow   |
|         | D3S3023    | MP-extended | SZ-extended |
|         | 478B14-848 | MP-extended | SZ-narrow   |
|         | D8S1110    | MP-extended | SZ-extended |
|         | D8S1110    | MP-extended | SZ-narrow   |



|          |             |             |
|----------|-------------|-------------|
| D8S1110  | MP-extended | BP-narrow   |
| D13S1233 | MP-extended | BP-extended |
| D13S1312 | MP-extended | SZ-narrow   |
| D13S287  | MP-extended | SZ-narrow   |
| D13S287  | MP-extended | SZ-extended |
| D13S326  | MP-extended | BP-extended |
| D13S788  | MP-extended | SZ-narrow   |
| D13S788  | MP-extended | SZ-extended |

**Supplementary Table 8:** Two-locus model maximizing the conditional LOD score for marker pairs with the strongest signals.

|           |       | Penetrance function for<br>the specific phenotype<br>$f_S(G_1, G_2)$ |     |     | Penetrance function for other<br>phenotypes within broad<br>$(f_B - f_S)(G_1, G_2)$ |         |         | Complement of the penetrance<br>function for the unaffected subjects<br>$1 - f_B(G_1, G_2)$ |         |         |
|-----------|-------|----------------------------------------------------------------------|-----|-----|-------------------------------------------------------------------------------------|---------|---------|---------------------------------------------------------------------------------------------|---------|---------|
|           | $G_2$ | $G_1$                                                                |     |     | $G_1$                                                                               |         |         | $G_1$                                                                                       |         |         |
|           |       | a/a                                                                  | A/a | A/A | a/a                                                                                 | A/a     | A/A     | a/a                                                                                         | A/a     | A/A     |
| D10S245-  | a/a   | 0                                                                    | 0   | 0   | 0                                                                                   | 0       | 0.1     | 1                                                                                           | 1       | 0.9     |
| D8S1110   | A/a   | 0                                                                    | 0   | 0.9 | 0                                                                                   | 0       | 0.00001 | 1                                                                                           | 1       | 0.09999 |
| (MPe-BPn) | A/A   | 0                                                                    | 0   | 0.9 | 0                                                                                   | 0       | 0.00001 | 1                                                                                           | 1       | 0.09999 |
| D3S2418-  | a/a   | 0                                                                    | 0   | 0   | 0.0365                                                                              | 0.7365  | 0.7365  | 0.9635                                                                                      | 0.2635  | 0.2635  |
| D8S1110   | A/a   | 0                                                                    | 0.7 | 0.7 | 0.0365                                                                              | 0.03651 | 0.03651 | 0.9635                                                                                      | 0.26349 | 0.26349 |
| (MPe-SZe) | A/A   | 0                                                                    | 0.7 | 0.7 | 0.0365                                                                              | 0.03651 | 0.03651 | 0.9635                                                                                      | 0.26349 | 0.26349 |

$G_1$  : Genotype at locus 1,  $G_2$  : Genotype at locus 2.
