# Supplementary material
Source: publisher figshare collection journal article supplement (https://karger.figshare.com/articles/dataset/_/5123815)
Supplement: Supplementary file 2 [file 1]

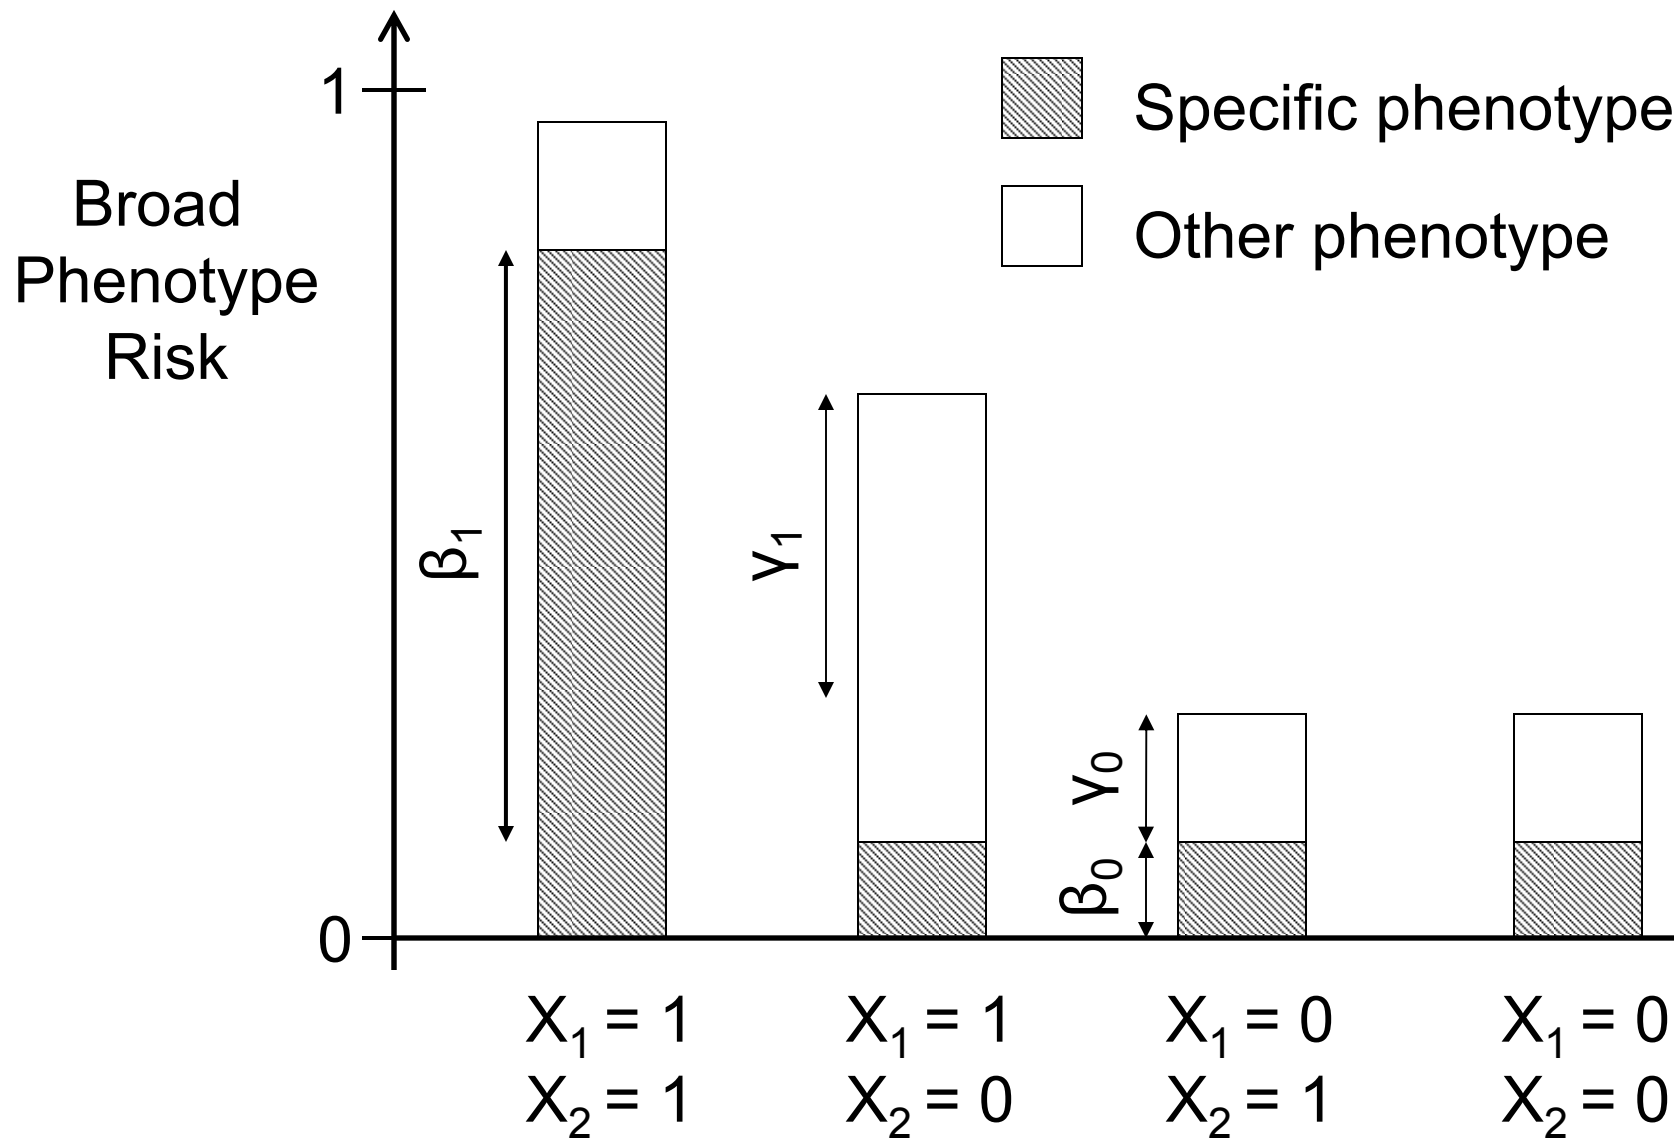

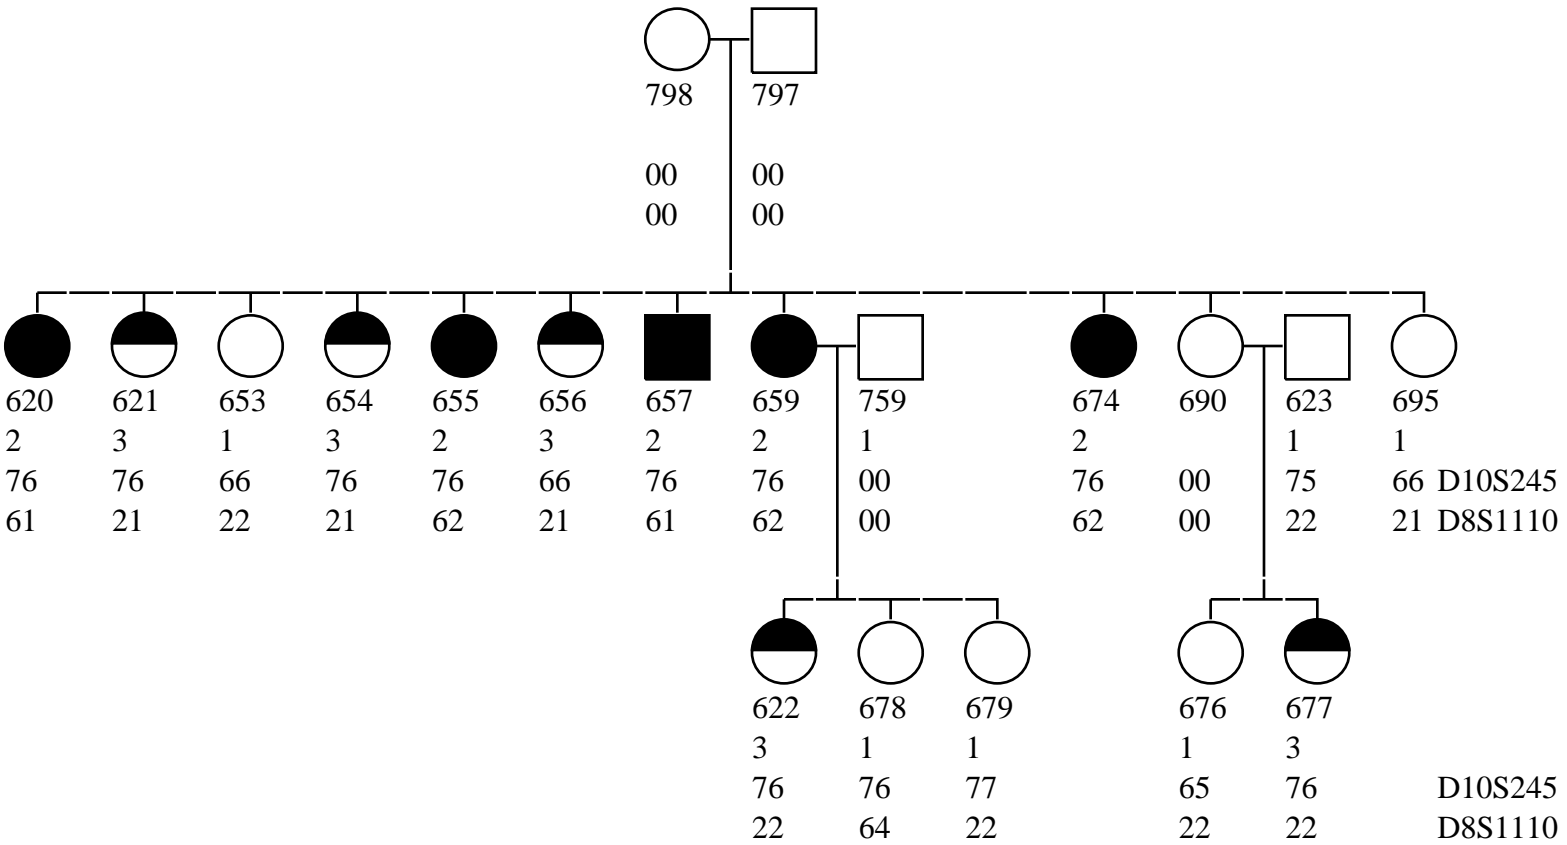

## **Supplementary figure legends**

**Supplementary Figure 1 :** Penetrance parameters for proposed two-locus model space with specific and broad phenotype.

**Supplementary Figure 2 :** Genotypes of the members of the family with the greatest contribution to the signal at D8S1110 when conditioning on D10S245. Filled symbols: bipolar disorder; half-filled symbols: major psychosis disorder other than bipolar. Empty symbols: unaffected, except for 759, 797 and 798 whose diagnosis is unknown. Alleles are coded with single digits. Missing genotypes are indicated by 00.
